# Supplementary material
Source: Research Square preprint supplement (doi:10.21203/rs.3.rs-9117914/v1)
Supplement: Supplementary file 1 [file ac495f6d277995f94c550e52.docx]

**SUPPLEMENTARY MATERIAL**

**Food insecurity in a cohort of Jamaican women in the preconception and prenatal period**

Carolyn R Taylor-Bryan1*, Asha V Badaloo1, Novie O M Younger-Coleman2, Orgen S Brown1, Janeila K Frater-Williams1, Tameka M Duncan-Baker1, Daniel J Thomas 1, Georgiana M Gordon-Strachan1

1Tropical Metabolism Research Unit, Caribbean Institute for Health Research, University of the West Indies, Kingston 7, Jamaica

2Epidemiology Research Unit, Caribbean Institute for Health Research, University of the West Indies, Kingston 7, Jamaica

***Corresponding author:** Carolyn Taylor-Bryan

E-mail: [carolyn.taylorbryan@uwi.edu](mailto:carolyn.taylorbryan@uwi.edu)

**Source of Support:** The International Atomic Energy Agency, CRP E4.30.32

**Short title**: Food insecurity in pregnancy

**DEMOGRAPHIC AND SOCIOECONOMIC STATUS QUESTIONNAIRE**

Mother’s study ID: _________________

Date: _ _ / _ _ / _ _ _ _ /

dd mm y y y y

Initials of interviewer: ________________________________

| NO. | QUESTIONS | CODING CATEGORIES |  |
| --- | --- | --- | --- |
| 1 | Do you currently work?  *(If on maternity leave, code ‘Yes*’) | Yes…….. ………..……………………..………1  No………………………………………………2 | 2 → 3 |
| 2 | What type of work do you do? | ……………………………………………………  *Code afterwards*  Unskilled ……………………………….…..….1  Semi-skilled……………………………..…..….2  Skilled …………………………………….....…3  Highly skilled………….……………………….4  Lower professional & managerial..……….....…5  Highly professional & managerial..…………….6 | Go to 5 |
| 3 | *(If not* currently *working)*  Have you ever worked before? | Yes……………………………………………..1  No………………………………………………2 | 2 → 5 |
| 4. | *(If yes)*  What was the last job you did? | ……………………………………………………  *Code afterwards*  Unskilled ……………………………….…..….1  Semi-skilled……………………………..…..….2  Skilled …………………………………….....…3  Highly skilled………….……………………….4  Lower professional & managerial..……….....…5  Highly professional & managerial..…………….6 |  |
| 5 | Are you ………………….? | Single …………………......................................1 Married living with partner……………..………2  Married but separated…………………….…….3  Not married, living with partner………………..4  Divorced ………………………………………..5  Widowed………….…………………………….6 |  |
| 6 | What was the last school you went to?  *(Highest level of education completed)* | No formal education....…………………………1  Primary school………….………………………2  All Age and Junior High…………….………….3  Secondary School…….………………………...4  High School………………………………….....5  Vocational training …………………………….6  First degree………………………………….….7  Post-graduate……………………………….…..8 |  |

| NO. | QUESTIONS | CODING CATEGORIES |  |
| --- | --- | --- | --- |
| 7 | *(Applicable primary/high school level)*  What was the last grade you went to? | ……………………………………………… |  |
| 8 | Do you currently smoke? | Yes……………………………………………...1  No………………………………………………0 | 0 → End |
| 9 | What do you smoke? | Cigarettes……………………………………….1  Ganja……………………………………………2  Other, Specify…………………… …………….3 |  |
| 10 | How many ………………. do you smoke /day? | ………………………. |  |
